# Supplementary material
Source: Springer Nature journal article supplement (https://www.springermedizin.de/resource/supplementary/12913_2011_2171_MOESM2_ESM.pdf/9529578)
Supplement: MOESM2 [file 9529578]

|                                                          | <b>System<br/>Functions</b>                                           | <b>Human<br/>Perspectives</b>                                                             | <b>The Health<br/>Care System</b>                                                                         |
|----------------------------------------------------------|-----------------------------------------------------------------------|-------------------------------------------------------------------------------------------|-----------------------------------------------------------------------------------------------------------|
| <b>Structure</b><br><br>What has been<br>put in place?   | Technology<br><br>What does the<br>intervention look like?            | Work<br>Organization<br><br>What new work<br>practices emerge?                            | Role of<br>Medicines<br><br>What is the role of<br>the intervention in the<br>wider healthcare<br>system? |
| <b>Process</b><br><br>What is done that<br>is different? | Processing<br><br>What processes<br>emerge and change?                | Social<br>Interactions<br><br>How do<br>communication<br>patterns and<br>workflow change? | Management of<br>Care Delivery<br><br>What organizational<br>changes emerge?                              |
| <b>Outcome</b><br><br>What has been<br>achieved?         | Validity of<br>Processing<br><br>Is the service safe and<br>reliable? | Quality of<br>The Service<br><br>Is the experience of<br>the service<br>satisfactory?     | Potential for<br>Change<br><br>How might the<br>intervention be used<br>in the future?                    |
